# Supplementary figures and images for: Clinical effectiveness of orthogeriatric and fracture liaison service models of care for hip fracture patients: population-based longitudinal study
Source: PubMed Central journal article supplement — Age Ageing. 2016 Jan 21;45(2):236–42. doi: 10.1093/ageing/afv204 (PMC4776625; doi:10.1093/ageing/afv204), 2016-01-21

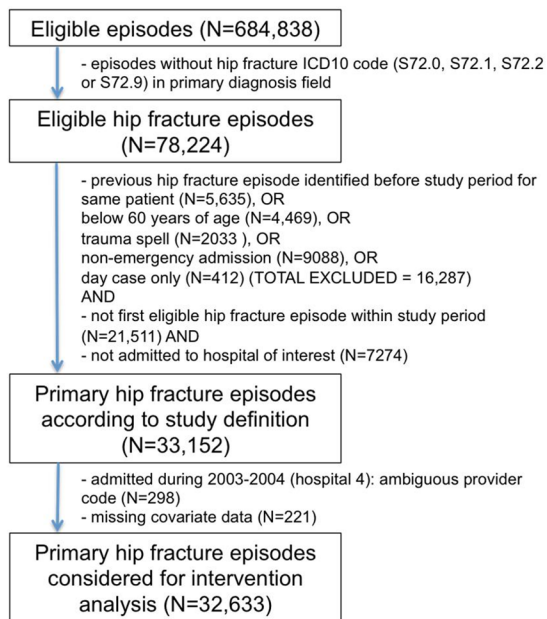

Appendix 1: population flow diagram

Supplement: supp_afv204_afv204supp_Appendix1.pdf [file supp_afv204_afv204supp_Appendix1.pdf]
